# Supplementary material
Source: PubMed Central journal article supplement (PMC2837804)
Supplement: NIHMS171826-supplement-notes.pdf [file NIHMS171826-supplement-notes.pdf]

**Video 1. Live cell confocal microscopy uptake of indinavir-1 by monocyte-derived macrophages.** Fluorescent microscopy (time in min) of monocyte-derived macrophages labeled green with Vybrant DiO cell-labeling solution and cocultured with indinavir-1 labeled red with rhodamine B 1,2-dihexadecanoyl-sn-glycero-3-phosphoethanolamine, triethylammonium salt. One image was taken every 10 min for 4 h at 60× magnification.

**Video 2. Live cell confocal microscopy uptake of indinavir-4 by monocyte-derived macrophages.** Fluorescent microscopy (time in min) of monocyte-derived macrophages labeled green with Vybrant DiO cell-labeling solution and cocultured with indinavir-4 labeled red with rhodamine B 1,2-dihexadecanoyl-sn-glycero-3-phosphoethanolamine, triethylammonium salt. One image was taken every 10 min for 4 h at 60× magnification.
